# Supplementary material
Source: PubMed Central journal article supplement (PMC4771407)
Supplement: NIHMS748812-supplement-01.pdf [file NIHMS748812-supplement-01.pdf]

## SUPPLEMENTAL MATERIAL

**Supplemental figure 1.**

Cumulative risk of VTE at selected index ages (A) by cohort and, in ARIC, for race- and sex-specific groups (B-E), with death considered a competing event. Lifetime risk for a given index age is cumulative risk through 85 years of age. ARIC, Atherosclerosis Risk in Communities study; CHS, Cardiovascular Health Study; VTE, venous thromboembolism.

**(A) Stratified by cohort**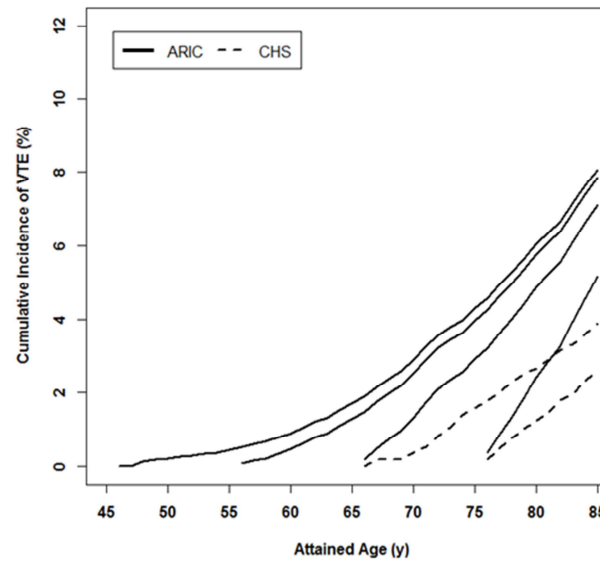**(B) ARIC only: African American**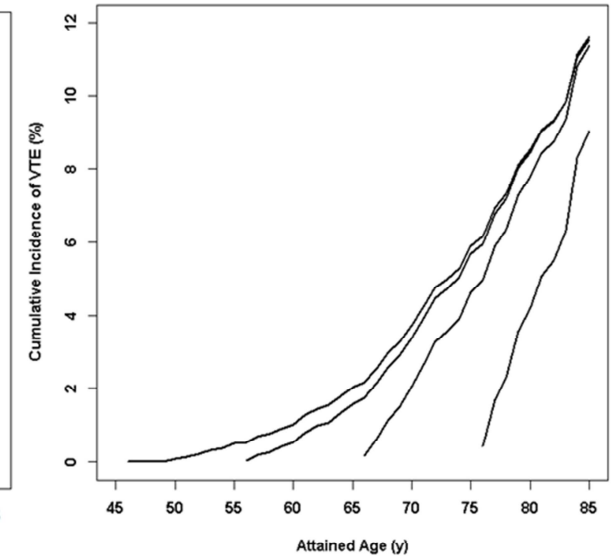**(C) ARIC only: Caucasian**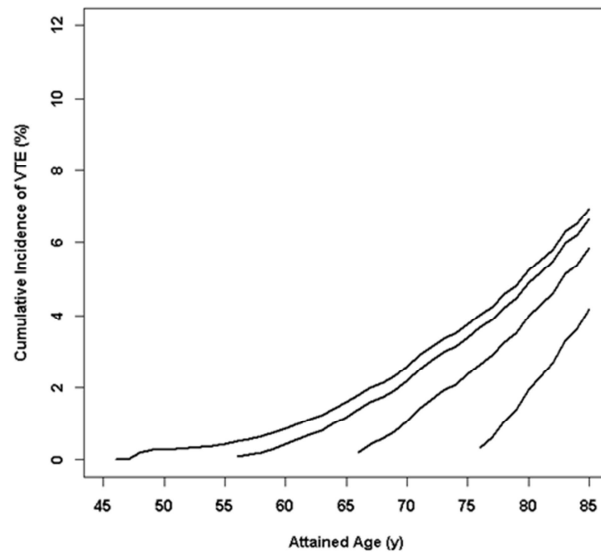**(D) ARIC only: Male**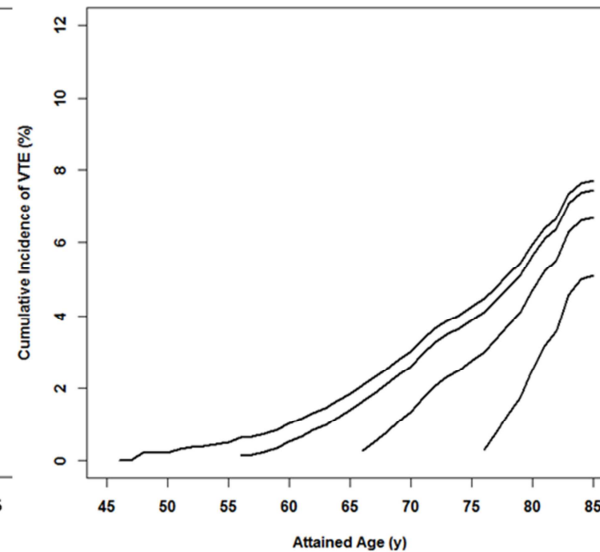**(E) ARIC only: Female**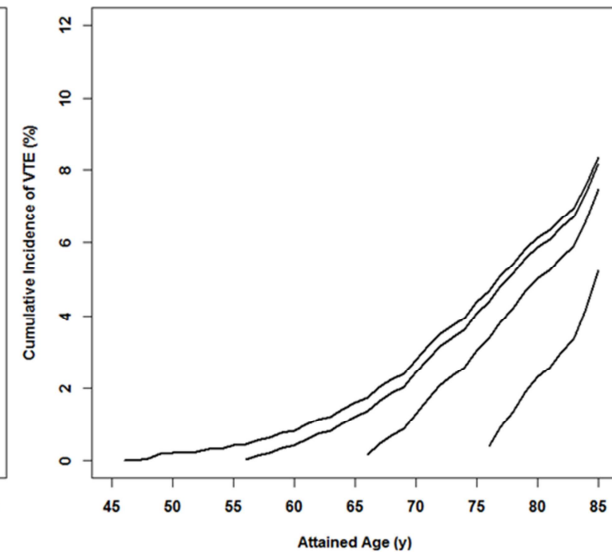

**Supplemental table 1. ARIC follow-up restricted to 2001: Incidence rates of VTE per 1,000 person-years, ARIC and CHS.**

| Age group | ARIC<br>(N = 14,185) |              |                        | CHS<br>(N = 5,414) |              |                        |
|-----------|----------------------|--------------|------------------------|--------------------|--------------|------------------------|
|           | # of VTE cases       | Person-years | Incidence rates of VTE | # of VTE cases     | Person-years | Incidence rates of VTE |
| 45-49     | 6                    | 11,517       | 0.5                    | -                  | -            | -                      |
| 50-54     | 15                   | 30,127       | 0.5                    | -                  | -            | -                      |
| 55-59     | 43                   | 45,229       | 1.0                    | -                  | -            | -                      |
| 60-64     | 62                   | 45,670       | 1.4                    | -                  | -            | -                      |
| 65-69     | 71                   | 32,751       | 2.2                    | 4                  | 4,819        | 0.8                    |
| 70-74     | 49                   | 15,755       | 3.1                    | 38                 | 14,145       | 2.7                    |
| 75-79     | 7                    | 2,920        | 2.4                    | 47                 | 17,353       | 2.7                    |
| 80-84     | 0                    | 2            | 0.0                    | 43                 | 11,320       | 3.8                    |
| 85-89     | -                    | -            | -                      | 31                 | 4,986        | 6.2                    |
| 90-94     | -                    | -            | -                      | 8                  | 1,358        | 5.9                    |
| 95-99     | -                    | -            | -                      | 1                  | 205          | 4.9                    |
| 100-104   | -                    | -            | -                      | 0                  | 22           | 0.0                    |

Baseline (1987-89) through **2001** in the ARIC Study.

Baseline (1989-90) through end of follow-up (2001) in CHS.

ARIC, Atherosclerosis Risk in Communities study; CHS, Cardiovascular Health Study;

VTE, venous thromboembolism.
